# Supplementary material for: Synergistic Photothermal Antibacterial Effects of Silver-Coated Upconversion Nanoparticles: Experimental Insights and DFT Calculations
Source: Research Square preprint supplement (doi:10.21203/rs.3.rs-7765354/v1), 2025-10-22
Supplement: Supplementary file 1 [file 8d23f150d42b9f819b7d4640.docx]

*Supporting Information*

**Synergistic Photothermal Antibacterial Effects of Silver-Coated Upconversion Nanoparticles: Experimental Insights and DFT Calculations**

Synergistic Photothermal Antibacterial Effects of Silver-Coated Upconversion Nanoparticles

Zhou Youa#, Ali Mohsinb#, Sobia Niazic, Ali Hussand, Reesha Khane, Tehmina Azamd, Muhammad Sajjadd, Faizan ul Haqc, Ali Razac, Khubaib Alif, Muhammad Shoaibg, Ibrahim Khand, Qi Shouh*, Shahid Iqbald Imran Mahmood Khand*,

a Institute of Food Safety and Nutrition, Jiangsu Academy of Agricultural Sciences, Nanjing 210014, P.R. China.

b State Key Laboratory of Bioreactor Engineering, East China University of Science and Technology, Shanghai 200237, P.R. China.

c School of Food Science and Technology, Jiangnan University, Wuxi, China.

d Nottingham Ningbo China Beacons of Excellence Research and Innovation Institute, University of Nottingham Ningbo China, Ningbo 315100, P.R. China.

e Food Science and Technology, University of Narowal, Pakistan.

f College of Food Science and Engineering, Yangzhou University, Yangzhou, Jiangsu 225127, China

g College of Biosystems Engineering and Food Science, Zhejiang University 866 Yuhangtang Road, Hangzhou 310058, P.R. China

h College of Light Industry and Food Engineering, Nanjing Forestry University, Nanjing, 210037, China.

# The first two authors have equal contributions.

**Corresponding Authors:**

Imran Mahmood Khan

Emails: [imran-mahmood.khan@nottingham.edu.cn](mailto:imran-mahmood.khan@nottingham.edu.cn)


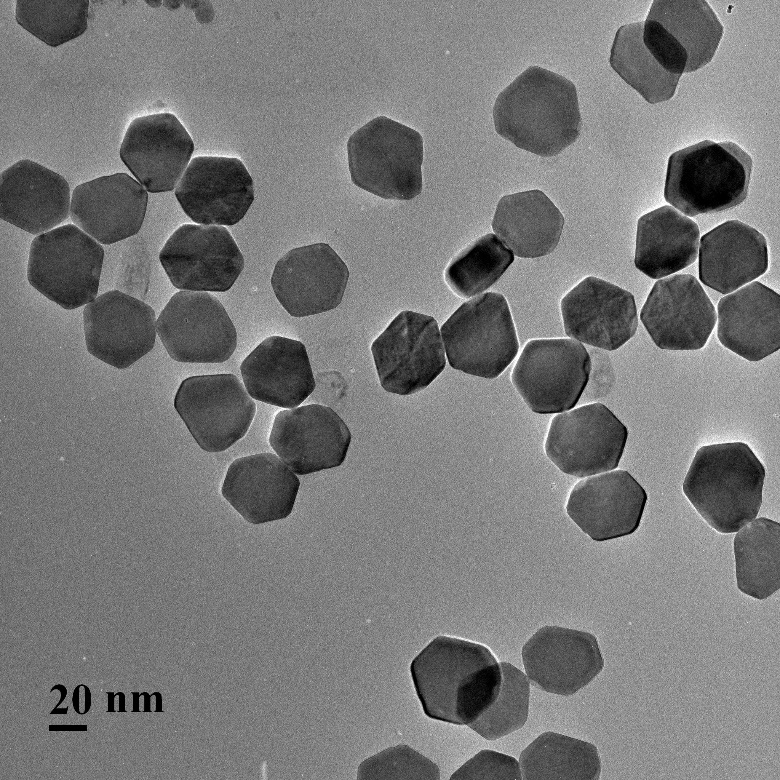


**Figure S1.** The TEM image of the UCNP, with an average diameter of 41.7 nm.


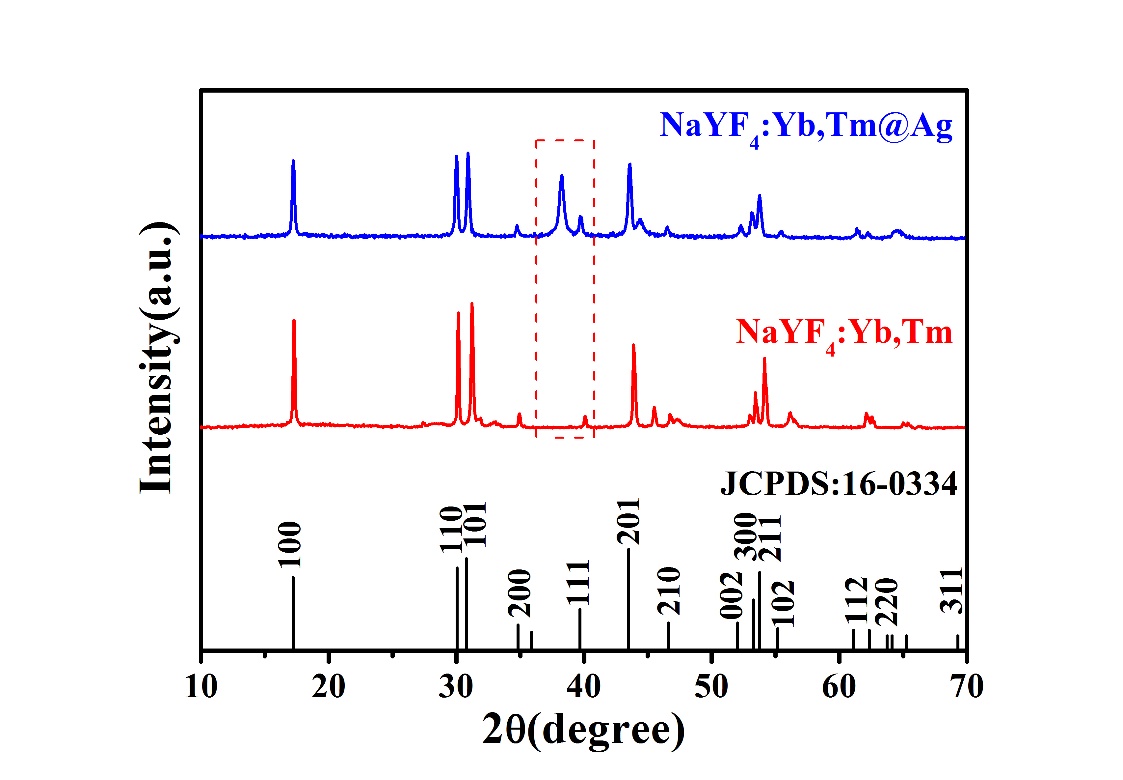


**Figure S2.** The X-ray diffraction patterns (XRD) of UCNP and UCNP@AgNPs.


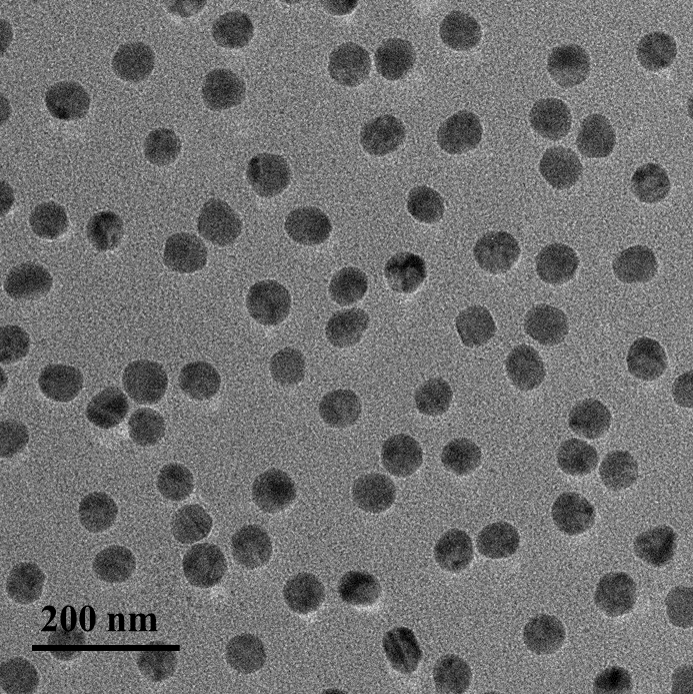


**Figure S3.** The TEM image of individual silver nanoparticles with the average particle size was estimated as 61.5 nm.


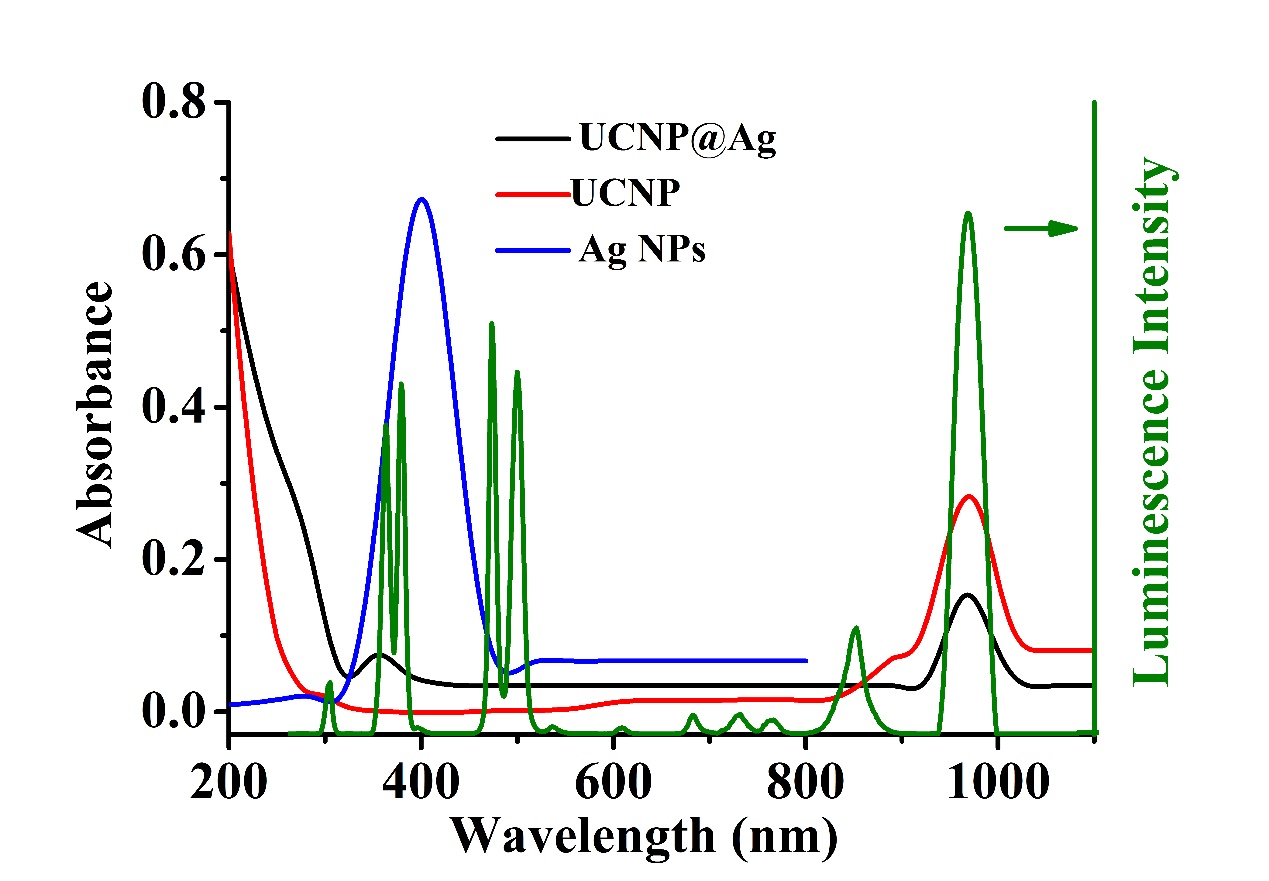


**Figure S4.** The UV-vis absorption spectrum of UCNP, AgNPs, and UCNP@Ag nanoparticles as well as the luminescence spectrum of UCNP (green line).


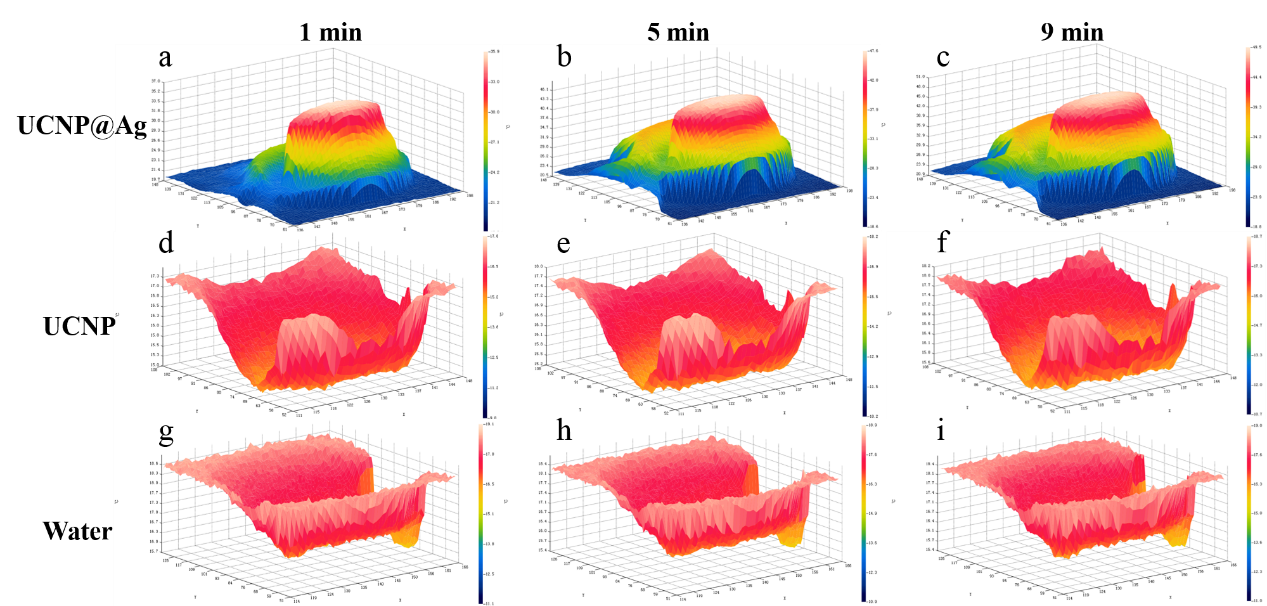


**Fig S5.** The photothermal performance of the UCNP@Ag nanoparticle (20 µg mL-1) and the control group, irradiated by a 980-nm NIR laser (1.0 W/cm2) for 9 min, monitored electronically using an Infrared Camera (FOTRIC-225). The corresponding temperature distribution maps of the measured solution with different irradiation times (a-c, the UCNP@Ag; d-f, UCNP; g-i, Water).


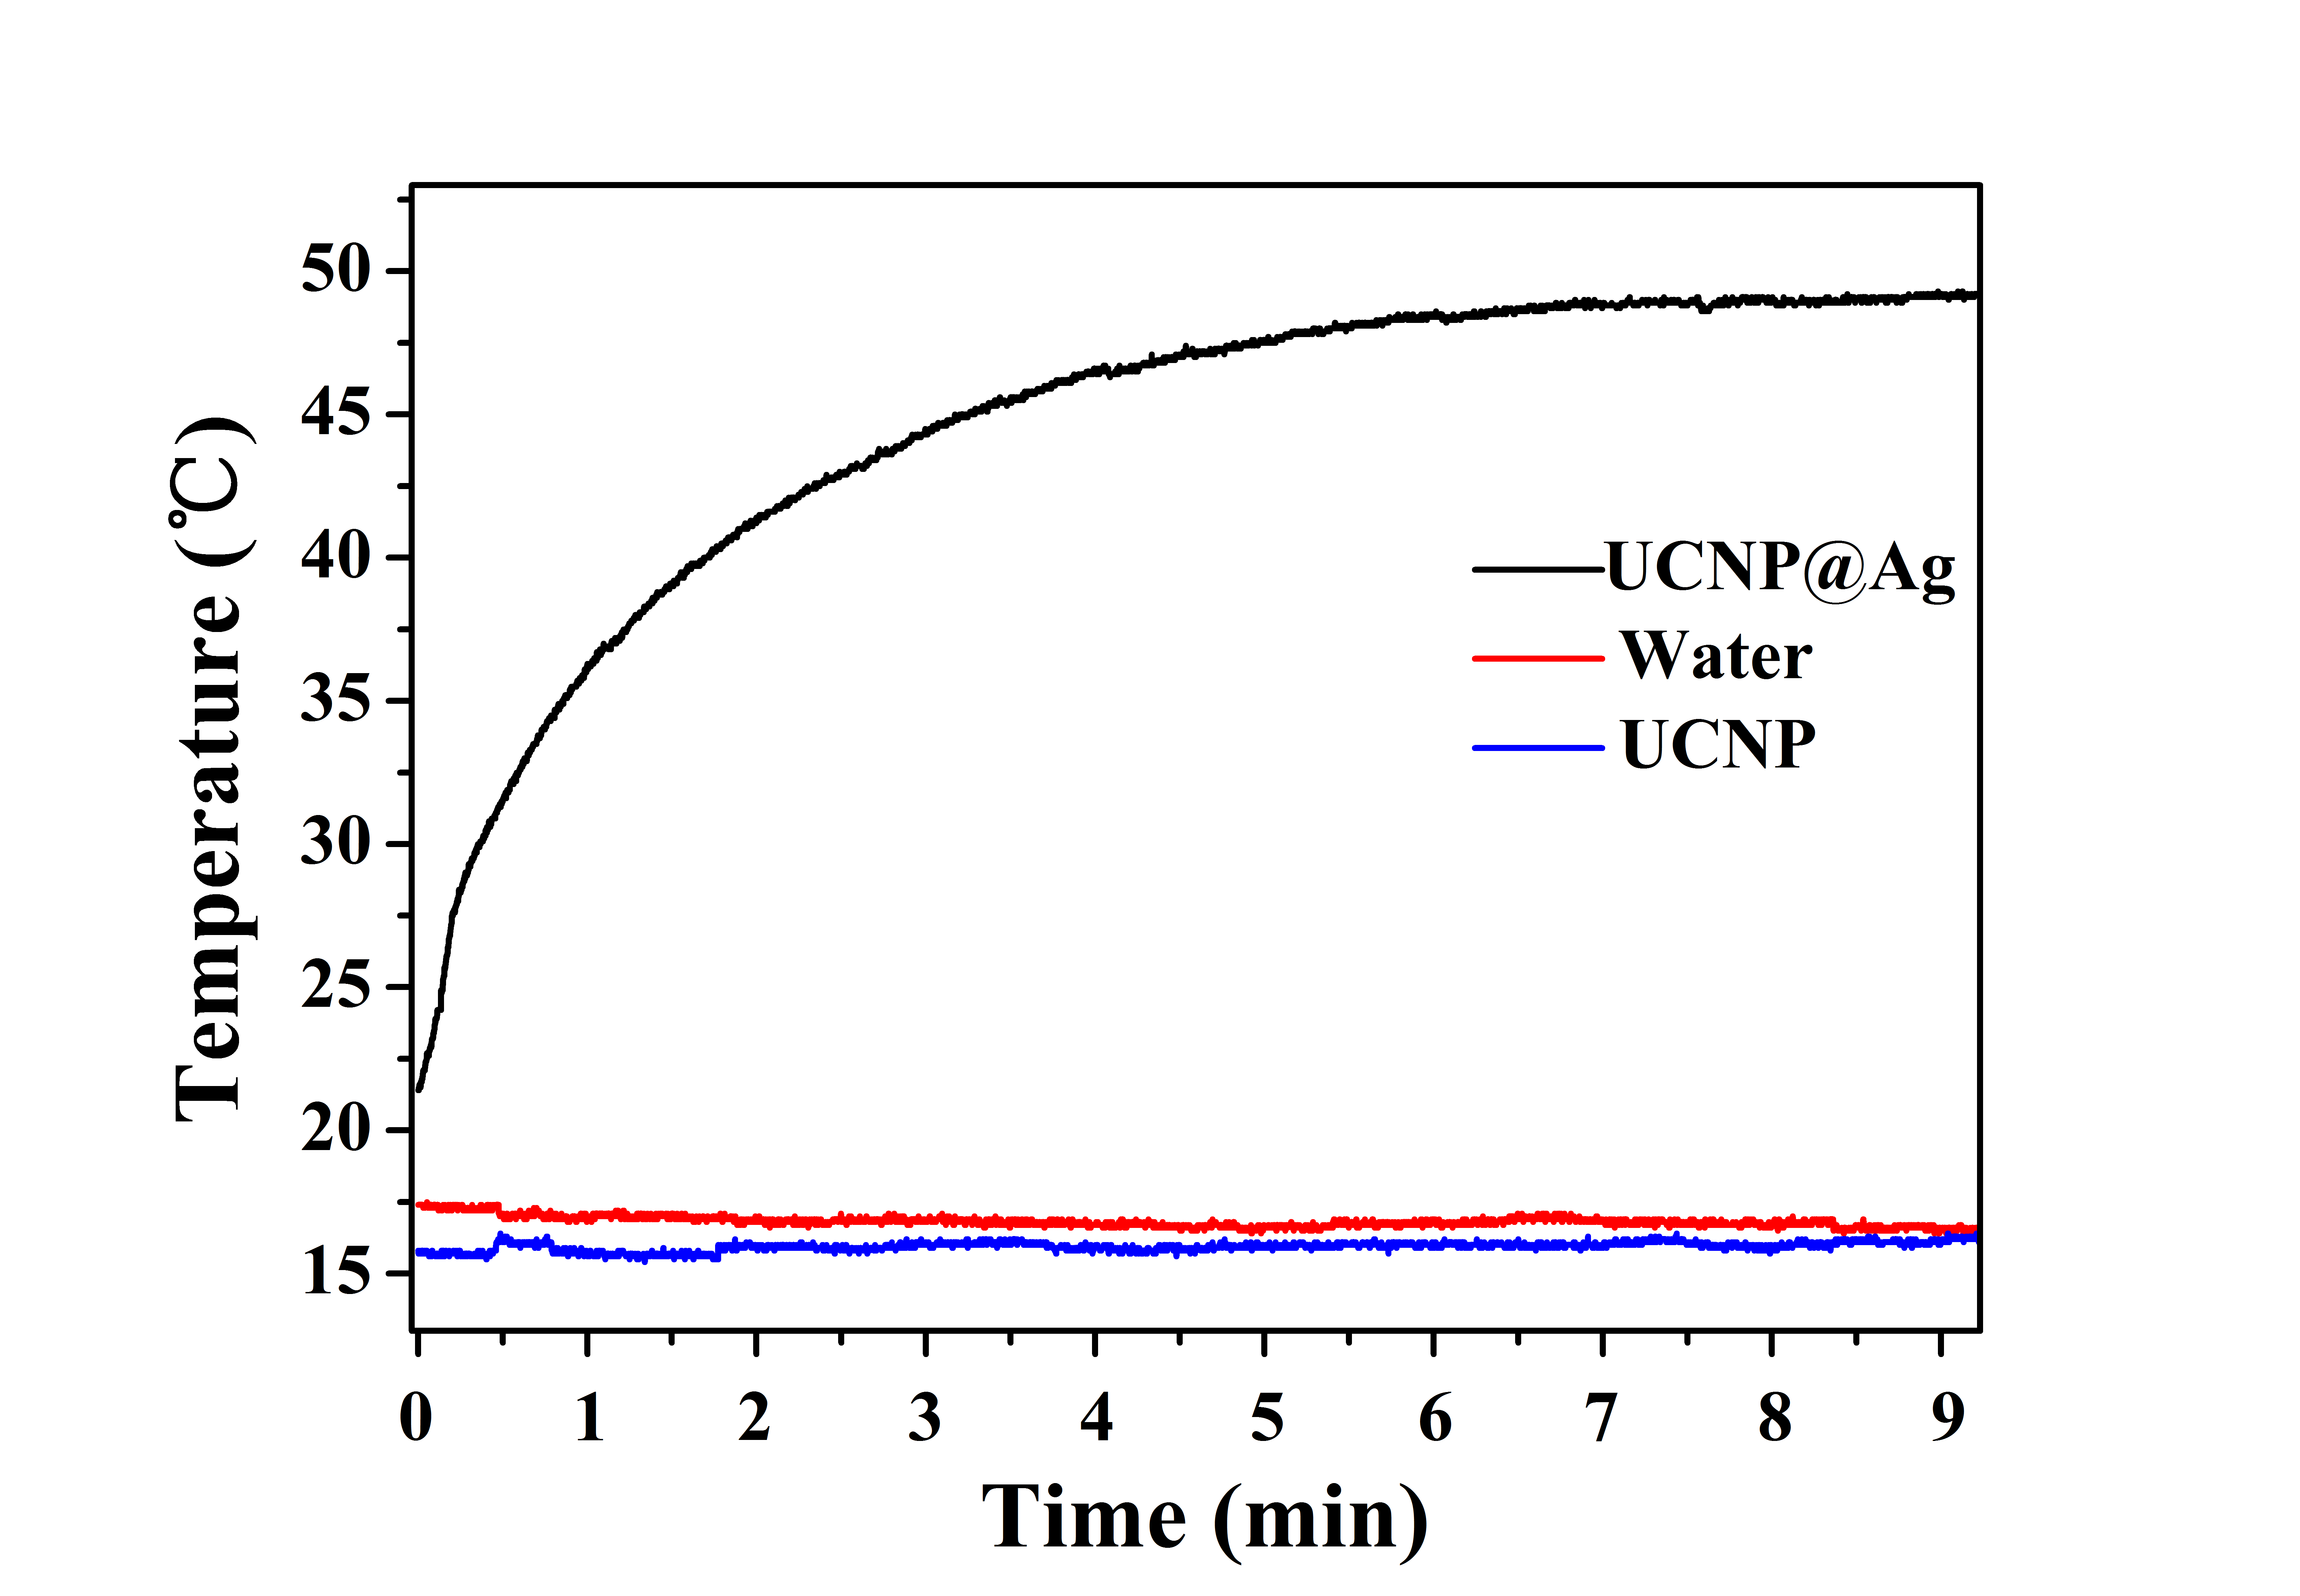


**Figure S6.** The temperature-time curves of the UCNP@Ag (20 µg mL-1), UCNP, and water.


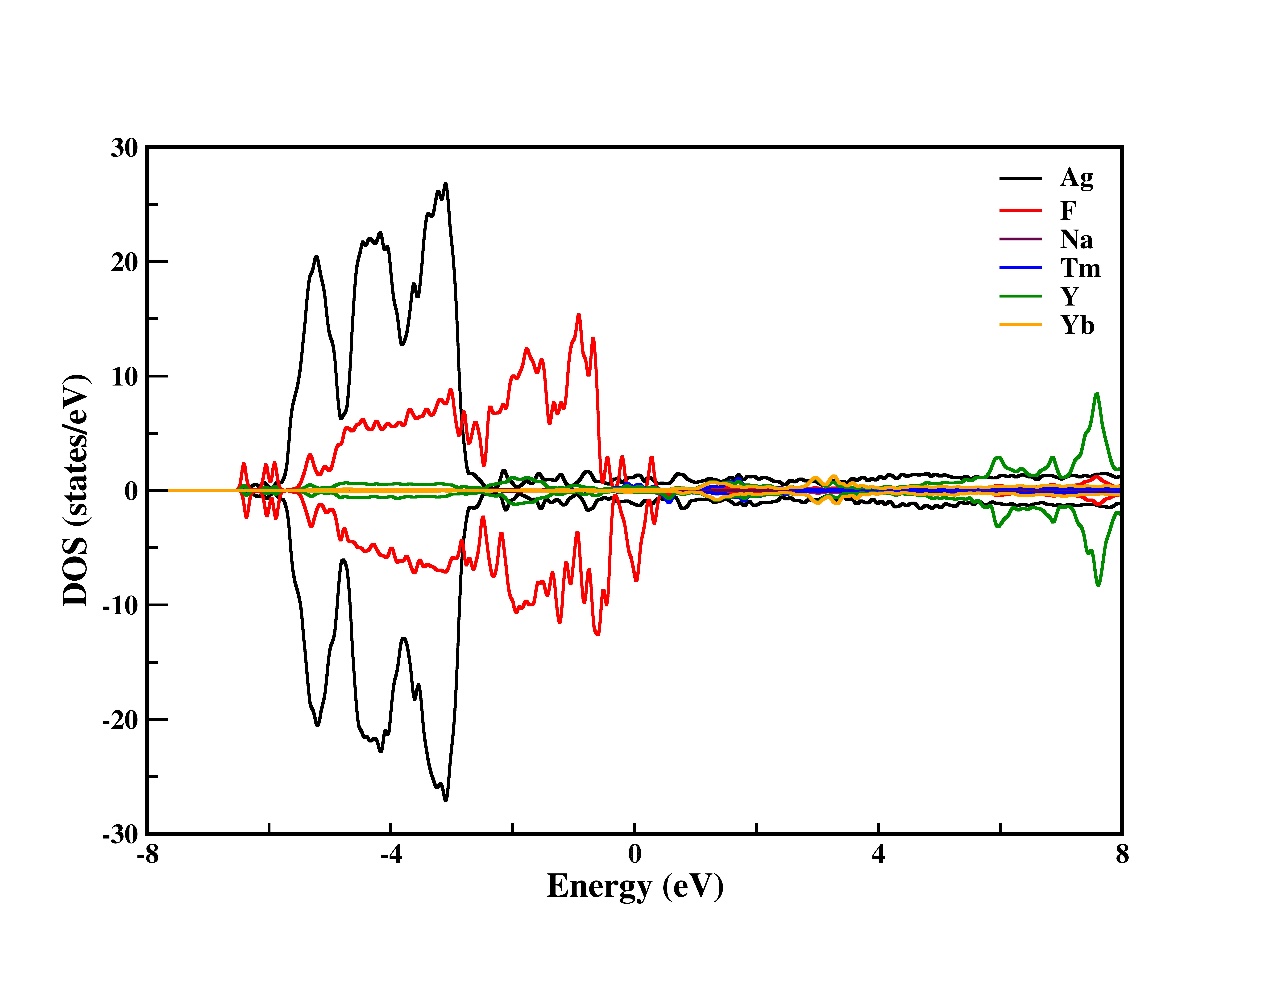


**Figure S7** :PDOS analysis for Ag@UCNPs
